# Supplementary material
Source: PubMed Central journal article supplement (PMC3936484)
Supplement: Supp_Fig6.pdf [file Supp_Fig6.pdf]

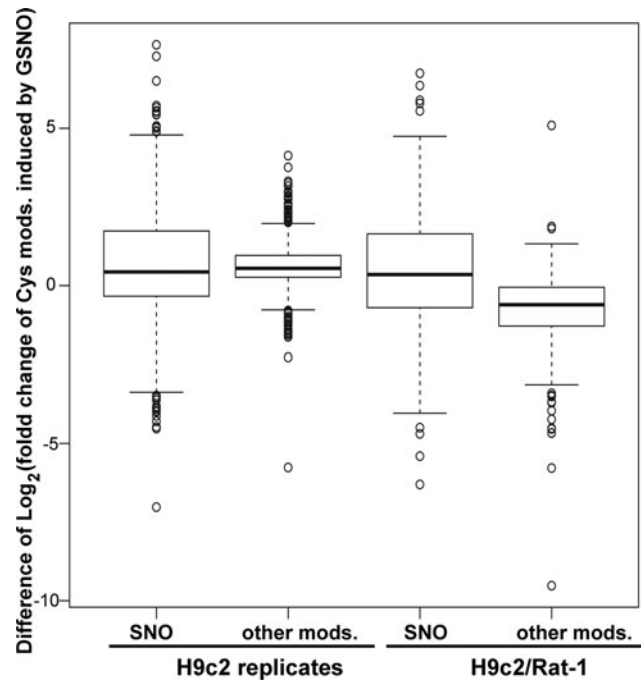

**SUPPLEMENTARY FIG. S6. H9c2 and Rat-1 cell lysates showed differential effects on GSNO induced fold changes of redox Cys modifications.** Equal amounts ( $\sim 300 \mu\text{g}$ ) of cell lysates from H9c2 or Rat-1 cells were *in vitro* treated with GSNO under the same condition, and the induced global changes of Cys redox modifications were determined by sequential iodoTMT switch and MS analysis. The variations of the fold change of SNO and other Cys modifications on the same Cys residues of the proteins from different cell lines were compared. Upon GSNO *in vitro* treatment of H9c2 cell lysates in a replicate experiment, the variations of the fold change of SNO on the same cysteine residues were higher than the one of the fold change of other Cys modifications. On the other hand, Rat-1 cell lysates showed higher fold change of other Cys modifications than GSNO-treated H9c2 cell lysate, while the change of SNO remained similar as the H9c2 replicates. SNO, S-nitrosylation.
